# Supplementary figures and images for: Epac1 increases migration of endothelial cells and melanoma cells via FGF2-mediated paracrine signaling
Source: PubMed Central journal article supplement — Pigment Cell Melanoma Res. 2014 May 9;27(4):611–20. doi: 10.1111/pcmr.12250 (PMC4283731; doi:10.1111/pcmr.12250), 2014-05-09

**Fig. S1**

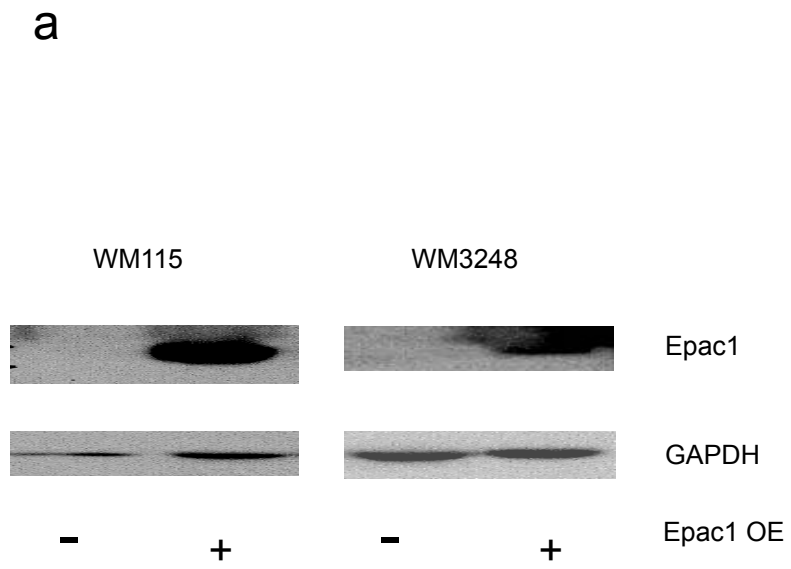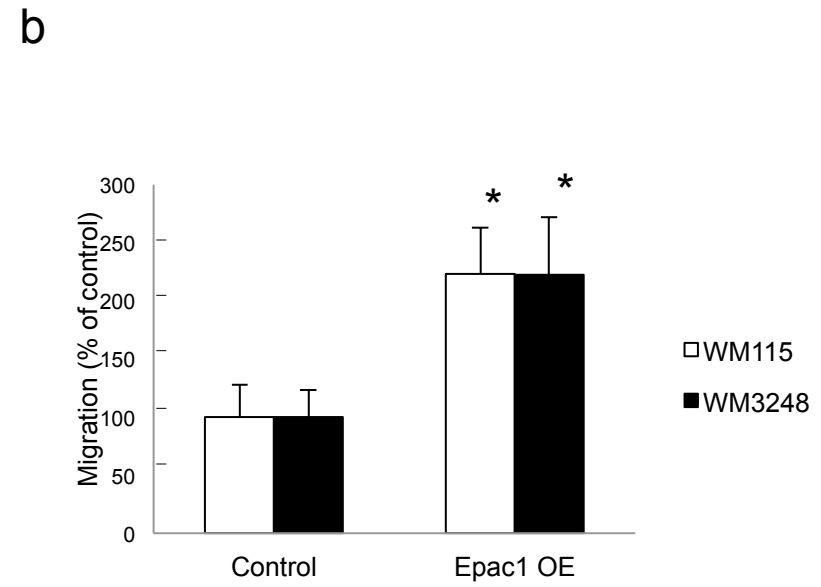

**Fig. S2**

**a**

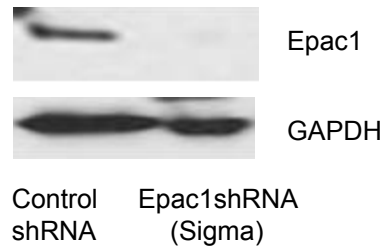

**b**

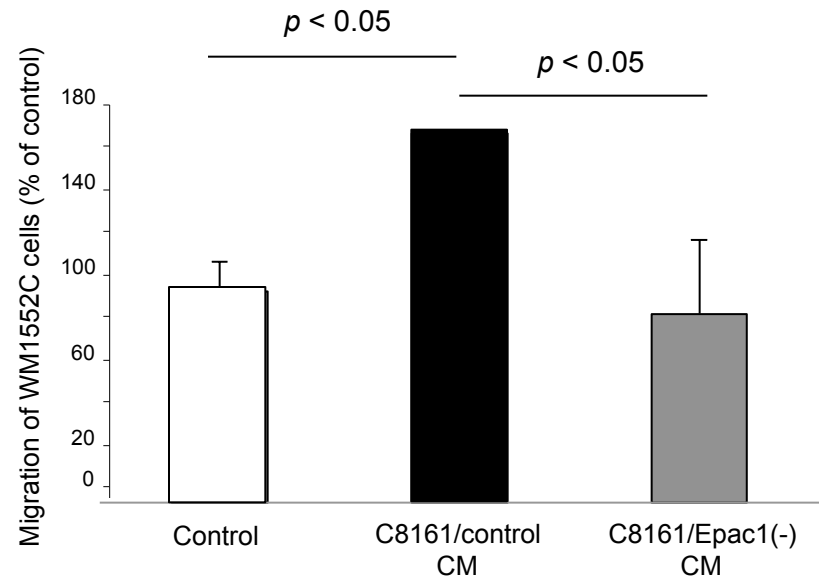

**Fig. S3**

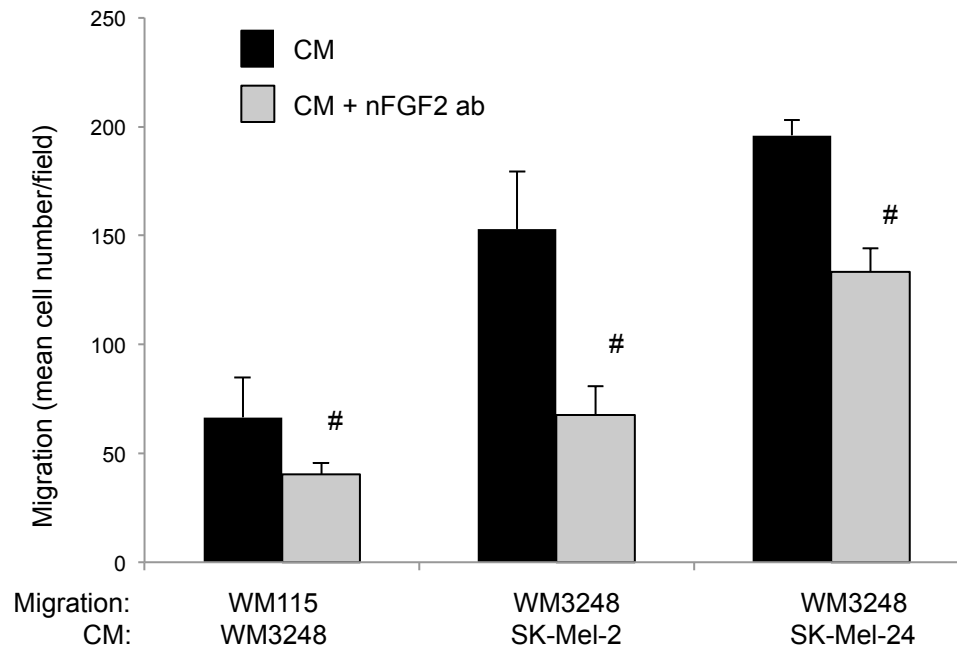

**Fig. S4**

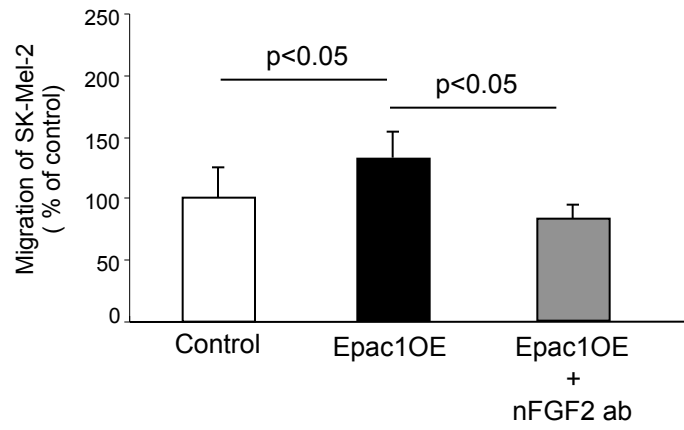

**Fig. S5**

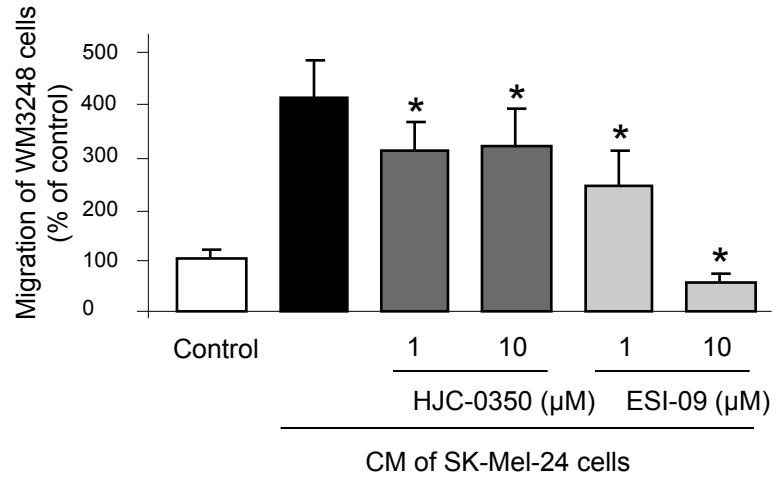

Supplement: pcmr0027-0611-sd1.pdf [file pcmr0027-0611-sd1.pdf]
